# Supplementary material for: Genetic variation in brown trout Salmo trutta across the Danube, Rhine, and Elbe headwaters: a failure of the phylogeographic paradigm?
Source: PubMed Central journal article supplement (PMC3765949; doi:10.1186/1471-2148-13-176), 2013-08-26
Supplement: 1471-2148-13-176-S4.pdf [file 1471-2148-13-176-S4.pdf]

**Additional File\_3.** Percentage Self Assignment (Q-values from STRUCTURE analysis) of all pure Danubian populations found in this study. One known stock transport from Anrasersee to the Anlaufbach/Winbach drainage was made and is clearly evidenced here. Additionally, fish from these streams were released into Fuscher Ache by local authorities.

0.979    0.972    0.972    0.900    0.977    0.802    0.931    0.952    0.926    0.975    0.770    0.598

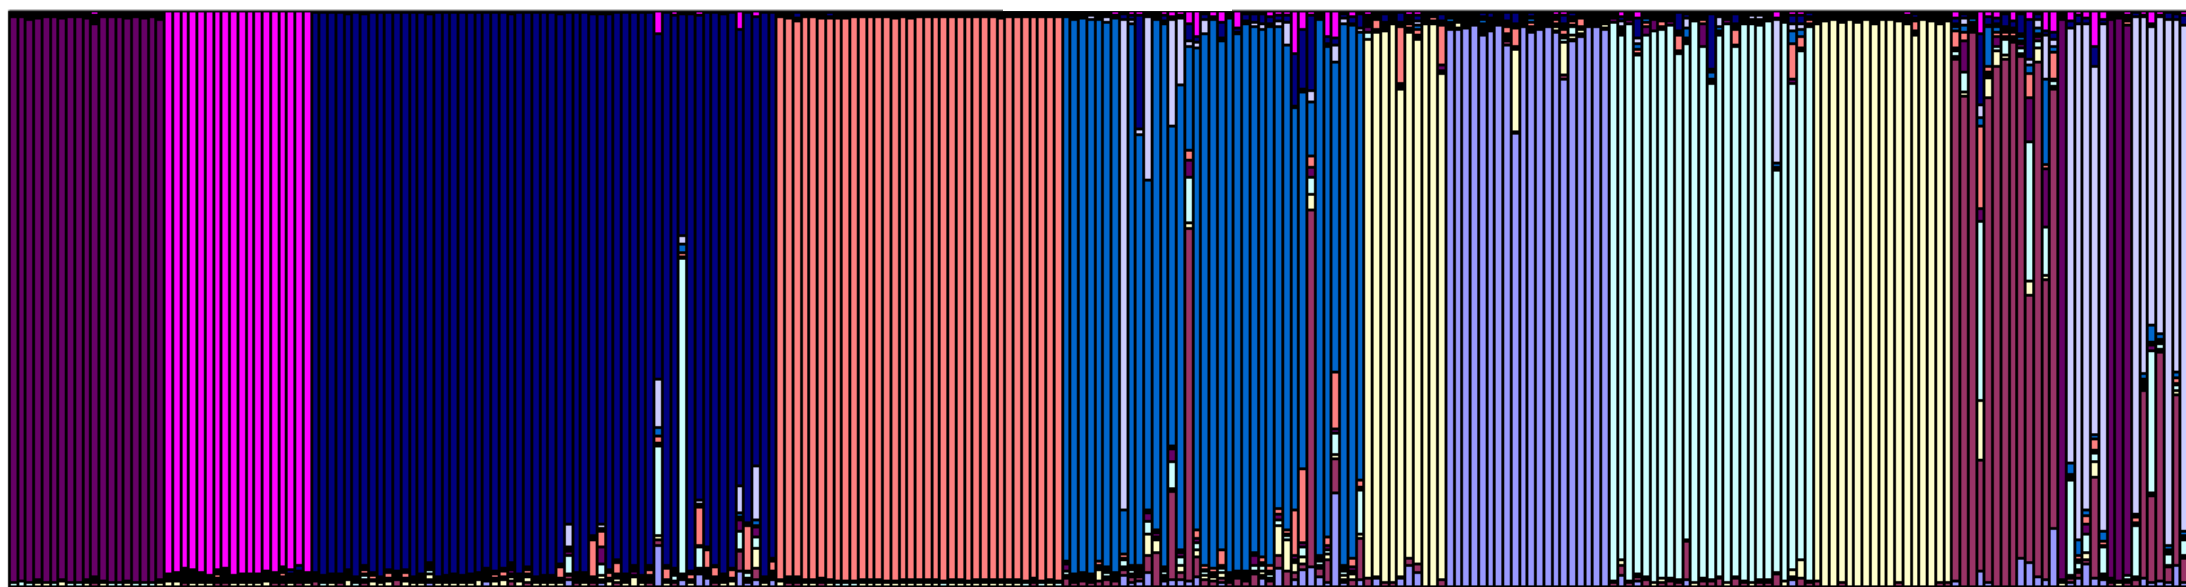

Anrasersee  
Bach in der Schutt  
Etrachbach  
Kotalmbach  
Moosbach  
Fuscher Ache  
Saggrabenbach  
Schafgrabenbach  
Tiefbach  
Wolfsgrabenbach  
Anlaufbach  
Winbach
